# Supplementary material for: Rational design of sequestered DNAzyme beacons to enable flexible control of catalytic activities
Source: Royal Society of Chemistry journal article supplement (doi:10.1039/c8ra05757e), 2018-01-01
Supplement: c8ra05757e1.pdf [file c8ra05757e1.pdf]

## Electronic Supplementary Information

### Rational design of sequestered DNzyme beacons to enable flexible control of catalytic activities

Wei Tang,<sup>\*a</sup> Mengxi Cheng,<sup>a</sup> Danling Dai,<sup>a</sup> Zhonghua Xiong<sup>a</sup> and Feng Liu<sup>b</sup>

<sup>a</sup>Institute of Materials, China Academy of Engineering Physics, Mianyang, 621700, China.

<sup>b</sup>Beijing National Laboratory for Molecular Sciences, Key Laboratory of Bioorganic Chemistry and Molecular Engineering of Ministry of Education, College of Chemistry and Molecular Engineering, Peking University, Beijing 100871, China.

\*Corresponding author. Email: weitang@caep.cn

**Table S1** DNA oligonucleotide sequences.

| Name         | Sequence (from 5' to 3')                                  |
|--------------|-----------------------------------------------------------|
| 17E          | CATCTCTTCTCCGAGCCGGTCGAAATAGTGAGT                         |
| S            | CTCACTAT rA GGAAGAGAT                                     |
| SDB (3'-B4)  | CATCTCTTCTCCGAGCCGGTCGAAATAGTGAGTTTCGTTTACTTA             |
| SDB (3'-B5)  | CATCTCTTCTCCGAGCCGGTCGAAATAGTGAGTTTCGATTTACTT<br>A        |
| SDB (3'-B6)  | CATCTCTTCTCCGAGCCGGTCGAAATAGTGAGTTTCGACTTTACTT<br>A       |
| SDB (3'-B7)  | CATCTCTTCTCCGAGCCGGTCGAAATAGTGAGTTTCGACCTTTAC<br>TTA      |
| SDB (3'-B8)  | CATCTCTTCTCCGAGCCGGTCGAAATAGTGAGTTTCGACCGTTTA<br>CTTA     |
| SDB (3'-B10) | CATCTCTTCTCCGAGCCGGTCGAAATAGTGAGTTTCGACCGGCAT<br>TACTTA   |
| SDB (3'-B12) | CATCTCTTCTCCGAGCCGGTCGAAATAGTGAGTTTCGACCGGCTC<br>TTTACTTA |

---

|                      |                                                               |
|----------------------|---------------------------------------------------------------|
| <b>SDB (5'-B4)</b>   | CATCTCTTCTCCGAGCCGGTCGAAATAGTGAGTTCGGTTTACTTA                 |
| <b>SDB (5'-B5)</b>   | CATCTCTTCTCCGAGCCGGTCGAAATAGTGAGTCTCGGTTTACTT<br>A            |
| <b>SDB (5'-B6)</b>   | CATCTCTTCTCCGAGCCGGTCGAAATAGTGAGTGCTCGGTTTACT<br>TA           |
| <b>SDB (5'-B7)</b>   | CATCTCTTCTCCGAGCCGGTCGAAATAGTGAGTGGCTCGGTTTAC<br>TTA          |
| <b>SDB (5'-B8)</b>   | CATCTCTTCTCCGAGCCGGTCGAAATAGTGAGTCGGCTCGGTTTA<br>CTTA         |
| <b>SDB (5'-B10)</b>  | CATCTCTTCTCCGAGCCGGTCGAAATAGTGAGTACCGGCTCGGTT<br>TACTTA       |
| <b>SDB (5'-B12)</b>  | CATCTCTTCTCCGAGCCGGTCGAAATAGTGAGTCGACCGGCTCG<br>GTTTACTTA     |
| <b>SDB (C-B4)</b>    | CATCTCTTCTCCGAGCCGGTCGAAATAGTGAGTCCGGTTTACTTA                 |
| <b>SDB (C-B5)</b>    | CATCTCTTCTCCGAGCCGGTCGAAATAGTGAGTACCGGTTTACTT<br>A            |
| <b>SDB (C-B6)</b>    | CATCTCTTCTCCGAGCCGGTCGAAATAGTGAGTACCGGCATTACT<br>TA           |
| <b>SDB (C-B7)</b>    | CATCTCTTCTCCGAGCCGGTCGAAATAGTGAGTACCGGCTTTTAC<br>TTA          |
| <b>SDB (C-B8)</b>    | CATCTCTTCTCCGAGCCGGTCGAAATAGTGAGTGACCGGCTTTTA<br>CTTA         |
| <b>SDB (C-B10)</b>   | CATCTCTTCTCCGAGCCGGTCGAAATAGTGAGTCGACCGGCTCTT<br>TACTTA       |
| <b>SDB (C-B12)</b>   | CATCTCTTCTCCGAGCCGGTCGAAATAGTGAGTTCGACCGGCTCG<br>TTTACTTA     |
| <b>SDB (B14)</b>     | CATCTCTTCTCCGAGCCGGTCGAAATAGTGAGTTTCGACCGGCTC<br>GGTTTACTTA   |
| <b>I</b>             | GAGGTAGGGTGAAGTAAGTAAACGAGCCGGTCGA                            |
| <b>I*</b>            | TCGACCGGCTCGTTTACTTACTTCACCCTACCTC                            |
| <b>SDB (C-B12-1)</b> | CATCTCTTCTCCGAGCCGGTCGAAATAGTGAGTTCGACCGGCTCG<br>TTTACTTACTTC |

---

---

|                          |                                                                                         |
|--------------------------|-----------------------------------------------------------------------------------------|
| <b>SDB (t-DNA)</b>       | CATCTCTTCTCCGAGCCGGTCGAAATAGTGAGTTCGACCGGCTCG<br>TTACTTA                                |
| <b>t-DNA</b>             | TAAGTAAACGAGCCGGTCGA                                                                    |
| <b>DS-Probe</b>          | CCTCTACTCTCACCTCACCATCTCTTCTCCGAGCCGGTCGAAATAG<br>TGAGTTTCGACGTGAGGTGAGAGTAGAGGTGAAGATT |
| <b>Target</b>            | AATCTTCACCTCTACTCTCACCTCAC                                                              |
| <b>G mutation</b>        | AATCGTCACCTCTACTCTCACCTCAC                                                              |
| <b>C mutation</b>        | AATCCTCACCTCTACTCTCACCTCAC                                                              |
| <b>A mutation</b>        | AATCATCACCTCTACTCTCACCTCAC                                                              |
| <b>SDB (10-23/C-B1)</b>  | GCTCTCCAGGCTAGCTACAACGACCTGCACCA                                                        |
| <b>SDB (10-23/C-B3)</b>  | GCTCTCCAGGCTAGCTACAACGACCTGCACCTAG                                                      |
| <b>SDB (10-23/C-B4)</b>  | GCTCTCCAGGCTAGCTACAACGACCTGCACCGTAG                                                     |
| <b>SDB (10-23/C-B5)</b>  | GCTCTCCAGGCTAGCTACAACGACCTGCACCGTAGC                                                    |
| <b>SDB (10-23/C-B6)</b>  | GCTCTCCAGGCTAGCTACAACGACCTGCACCTGTAGC                                                   |
| <b>SDB (10-23/C-B7)</b>  | GCTCTCCAGGCTAGCTACAACGACCTGCACCTGTAGCT                                                  |
| <b>SDB (10-23/C-B9)</b>  | GCTCTCCAGGCTAGCTACAACGACCTGCACCTGTAGCTA                                                 |
| <b>SDB (10-23/C-B12)</b> | GCTCTCCAGGCTAGCTACAACGACCTGCACCCGTTGTAGCTAG                                             |
| <b>SDB (10-23/C-B15)</b> | GCTCTCCAGGCTAGCTACAACGACCTGCACCTCGTTGTAGCTAGC<br>C                                      |
| <b>S (10-23)</b>         | GGTGCAGG rA UGGAGAGC                                                                    |

---

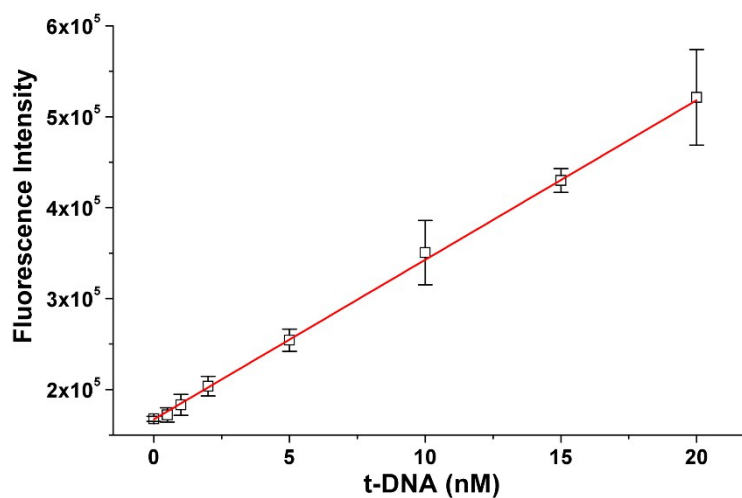

**Fig. S1** The linear responses at low DNA trigger concentrations. A linear correlation is obtained in the range of 0.5–20 nM with a detection limit of 0.2 nM based on 3S/N (signal-to-noise). The error bars represent the standard deviation of three measurements.
